# Supplementary material
Source: PubMed Central journal article supplement (PMC5797694)

## Epithelial derived TGF- $\beta$ 1 acts as a pro-viral factor in the lung during influenza A infection

Laura Denney\*, William Branchett\*, Robert A. Oliver, Lisa G. Gregory, Clare M. Lloyd

### Supplementary Figure legends

#### Supplementary Figure 1: Epithelial cell CCSP expression and BAL cell composition. (a)

Levels of bioactive TGF- $\beta$  in the airways 12hrs post influenza infection in epTGF $\beta$ KO and control mice. (b) CCSP mRNA expression from epithelial cells recovered from tracheal brushings from epTGF $\beta$ KO and control mice at day 1 post influenza infection. (c) Cellular composition of the BAL including airway macrophages (AMs) (CD64<sup>+</sup> CD11c<sup>+</sup> SiglecF<sup>+</sup>), neutrophils (Ly6G<sup>+</sup> CD11b<sup>+</sup>) and other CD45<sup>+</sup> leukocytes at 12hrs and day 1 post infection. (d-e) *Tgfb1* mRNA levels in (d) epithelial cells and (e) airway leukocytes 12hrs post infection from control and epTGF $\beta$ KO mice. (f) *Tgfb1* mRNA levels in epithelial cells and airway leukocytes 1 day post infection from control and epTGF $\beta$ KO mice. Data shown are representative of two independent experiments with a total of N $\geq$ 8 mice per group. Box and whisker plots depict the median and IQR and minimum and maximum values, Bar charts depict the median.

#### Supplementary Figure 2: Flow cytometry gating strategy for myeloid cells. FSC<sup>low</sup> SSC<sup>low</sup>

lymphocytes and CD45 negative cells were excluded before identifying airway macrophages as Siglec F<sup>+</sup> CD11c<sup>+</sup> and CD64<sup>+</sup>. Of the SiglecF negative cells, neutrophils were identified as

Ly6G<sup>+</sup> CD11b<sup>+</sup> and infiltrating monocytes and macrophages were identified as CD64<sup>+</sup> CD11b<sup>+</sup> Ly6G<sup>neg</sup> and CD11c<sup>neg</sup>. The inflammatory monocyte and macrophage gate contained cells with a range of Ly6C and MHCII expression. Representative plots shown from a control mouse BAL 3 days post influenza infection.

**Supplementary Figure 3: Immune response in the lung and airways after influenza infection in epTGFbKO and control mice. (a-b)** Percentage of airway macrophages (CD64<sup>+</sup> CD11c<sup>+</sup> SiglecF<sup>+</sup>) expressing **(a)** MHC-II and **(b)** CD11b after influenza infection of epTGFbKO and control mice at day 1, 3, 6 post infection. **(c)** Number of airway IFN-g<sup>+</sup> NK cells (NK1.1<sup>+</sup>CD3<sup>neg</sup>) **(d)** Number of ILC1s in the lung (IFN-g<sup>+</sup>ICOS<sup>+</sup>CD45<sup>+</sup>Lin<sup>neg</sup>) where lineage cocktail comprises (CD3, CD45R, CD11b, TER-119, Ly6G/GR1). **(e)** IFN-g<sup>+</sup> CD8 T cells (CD8<sup>+</sup>CD3<sup>+</sup>) in the airways. **(f)** IFN-g<sup>+</sup> CD4 T cells (CD4<sup>+</sup>CD3<sup>+</sup>) in the airways. **(g)** IL-17<sup>+</sup> CD4 T cells (CD4<sup>+</sup>CD3<sup>+</sup>) in the airways. **(h-i)** Tregs (Foxp3<sup>+</sup>CD25<sup>+</sup>CD4<sup>+</sup>) in the **(h)** airways and **(i)** lung. **(j)** Levels of IL-1b in the BAL. **(k)** IL-10 levels in the lung tissue. Data shown is pooled from two independent experiments with a total of N≥11 mice per group. Box and whisker plots depict the median and IQR and minimum and maximum values. \*p < 0.05, and \*\*p < 0.01.

**Supplementary Figure 4: Enhanced early IFN $\beta$  response in epTGFbKO airway leukocytes. (a)** X31 RNA levels in epithelial cells and airway leukocytes at 0, 12 and 24hrs post infection in epTGFbKO and control mice. **(b)** Graph shows correlation of IFN- $\beta$  levels in the airways and lung viral titres at day 1 post infection. **(c-d)** mRNA levels of *Oas2* at **(c)** 12hrs and **(d)** 1 day post infection in epithelial cells and airway leukocytes from control and epTGFbKO mice. **(e-f)** mRNA levels of **(e)** *Irf7* and **(f)** *Ifitm3* in airway leukocytes 1 day post infection from

control and epTGFbKO mice. Data representative of two independent experiments total N  $\geq$  8. Bar charts depict the median. Spearman correlation. \*\*p < 0.01.

**Supplementary Figure 5: IFN $\beta$  response at day 1 post RSV infection.** (a) Concentration of IFN- $\beta$  in the airways of epTGFbKO mice and control mice after RSV infection at day 0, 1, 3 and 7 post infection. Limits of detection were 7.25 pg/ml. (b-c) mRNA levels of *Ifnb1* in (b) epithelial cells and (c) airway leukocytes 1 day after RSV infection. (d-e) mRNA levels of *Oas2* in (d) epithelial cells and (e) airway leukocytes 1 day after RSV infection. Data representative of two independent experiments N  $\geq$  4. Bar charts depict the median. Box and whisker plots depict the median and IQR and minimum and maximum values and bar charts depict the median.

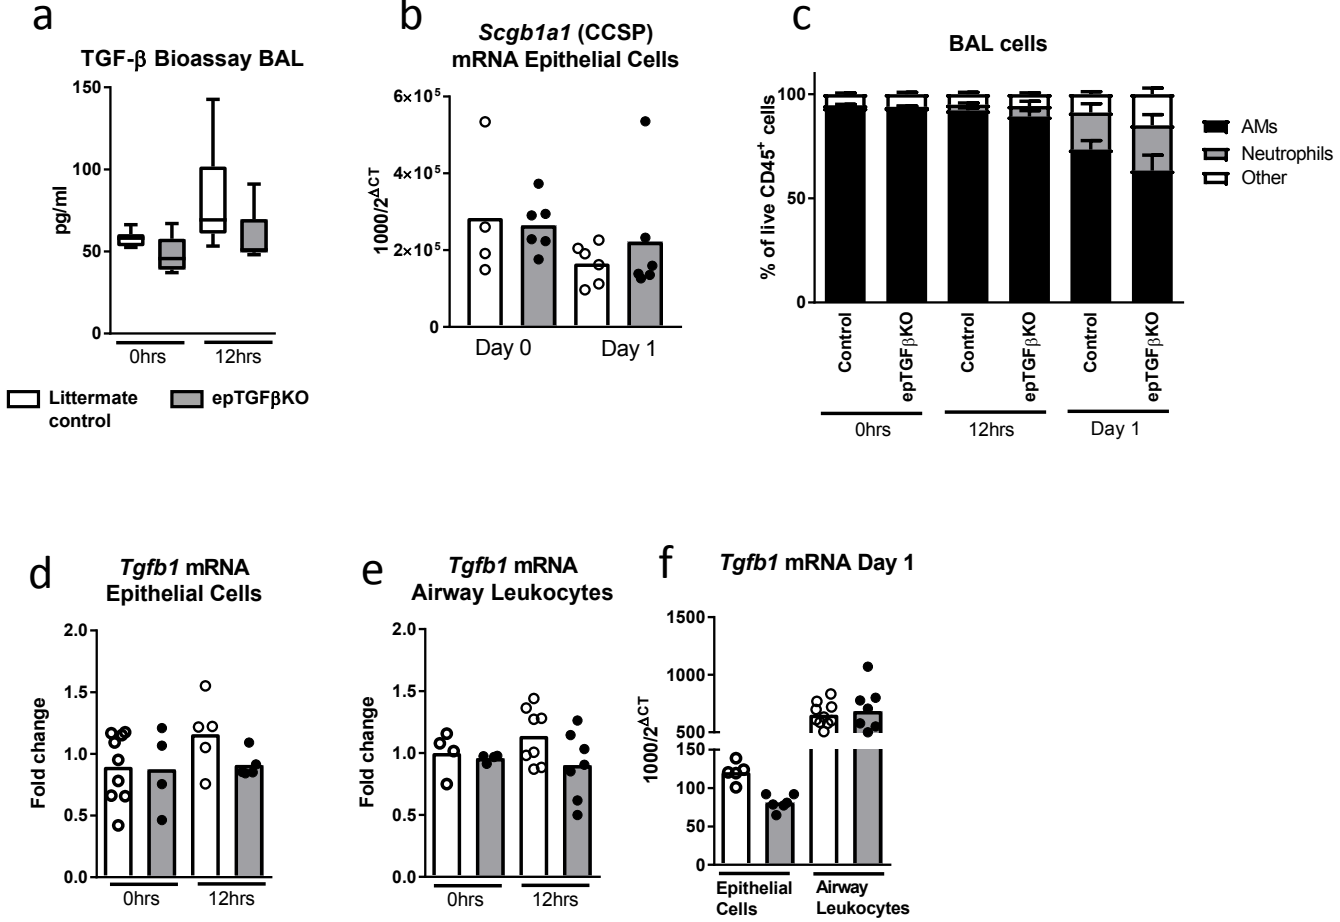

Pre-gated on live single cells

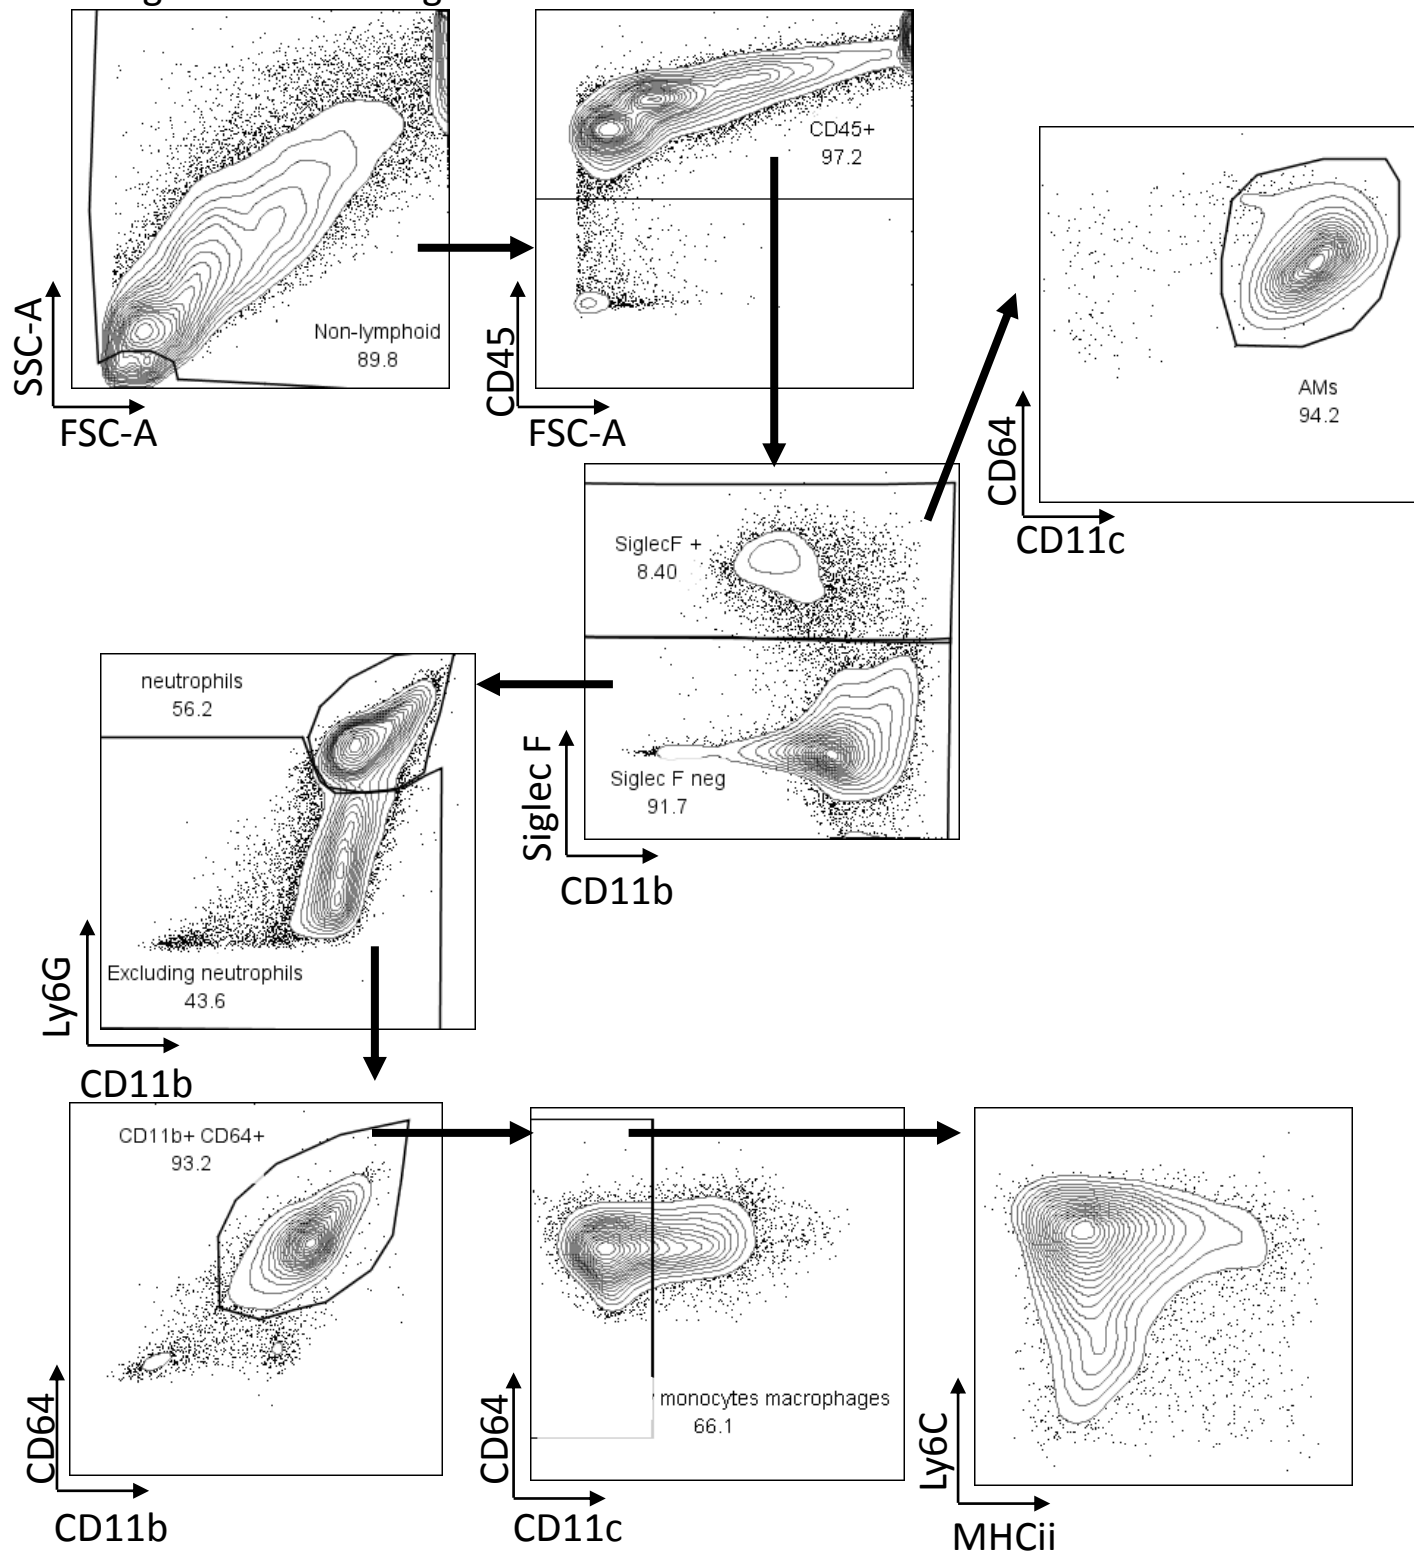

**a**

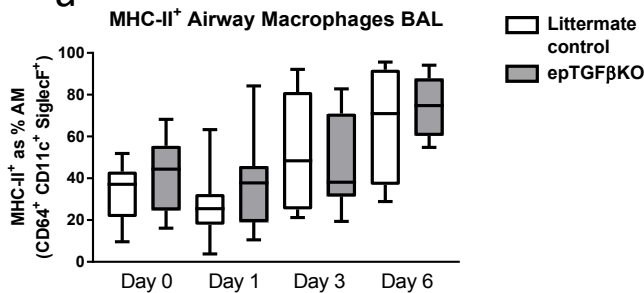

**b**

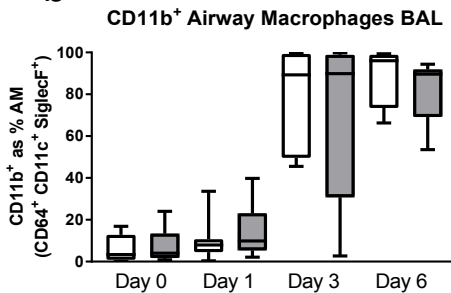

**c**

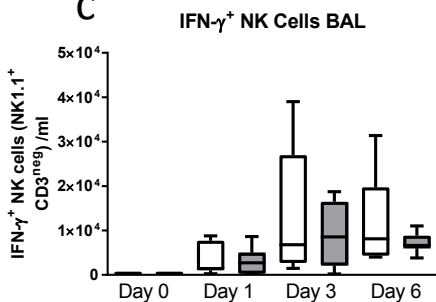

**d**

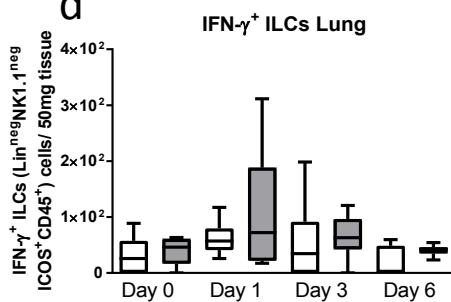

**e**

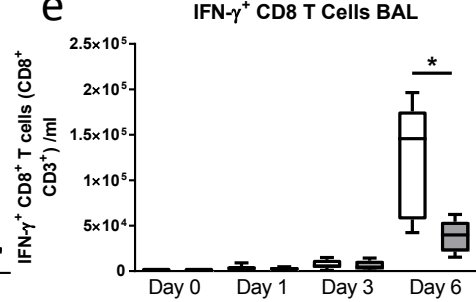

**f**

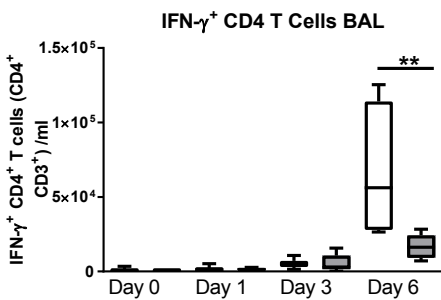

**g**

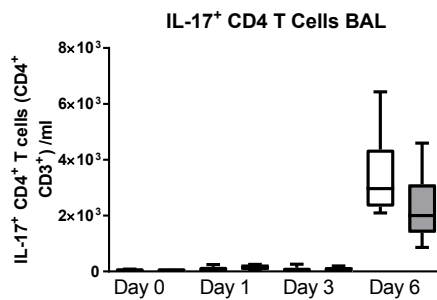

**h**

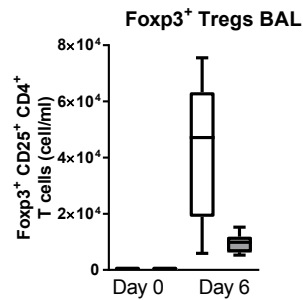

**i**

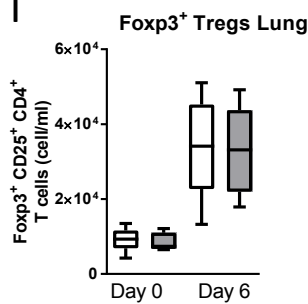

**j**

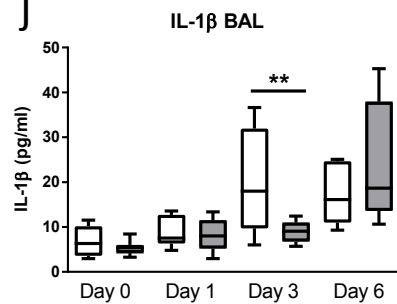

**k**

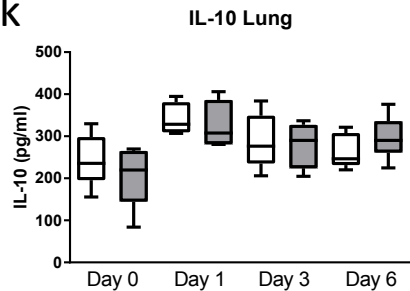

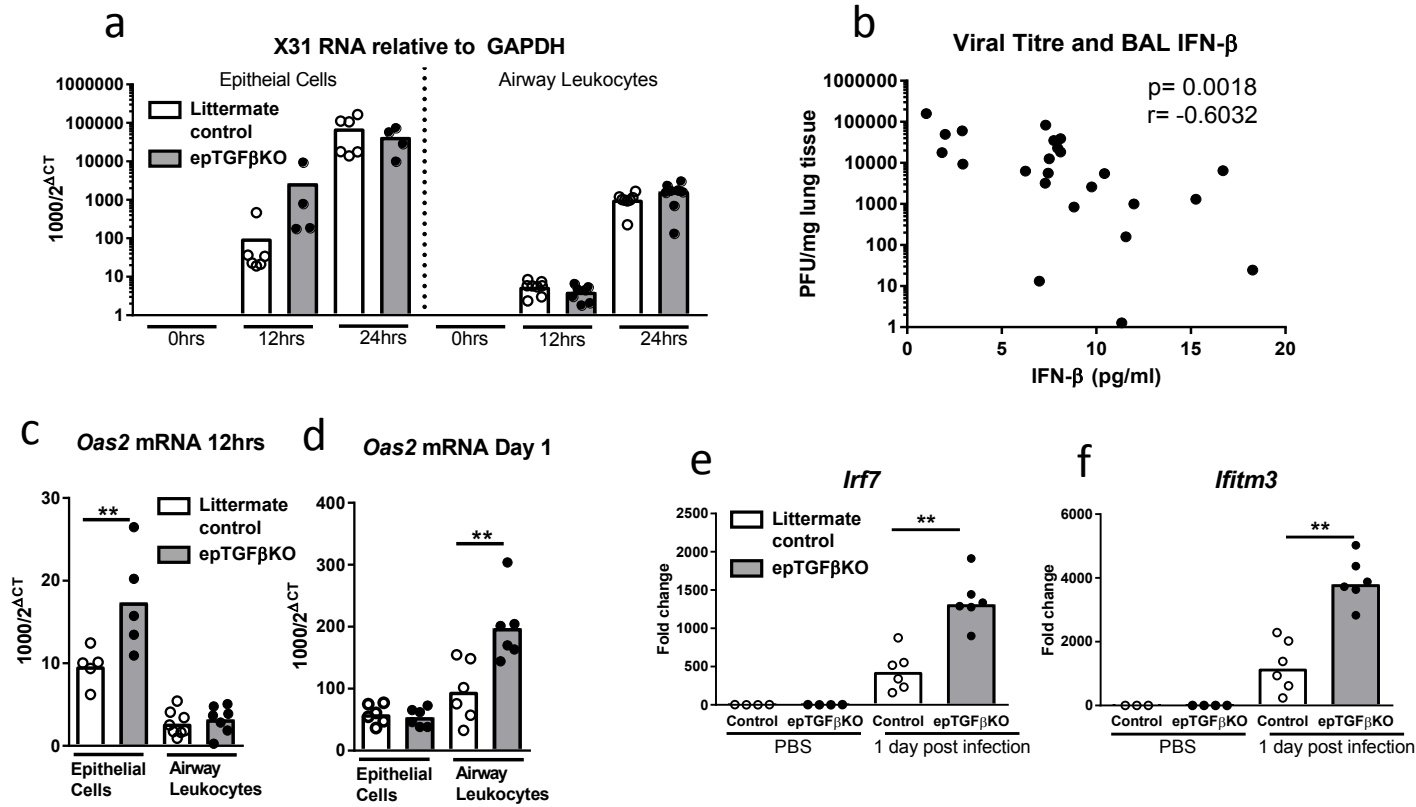

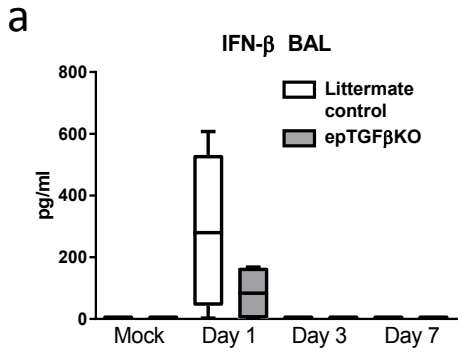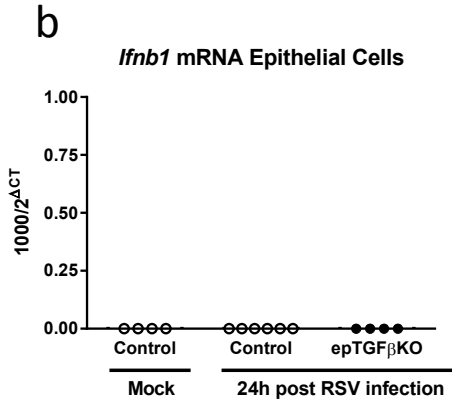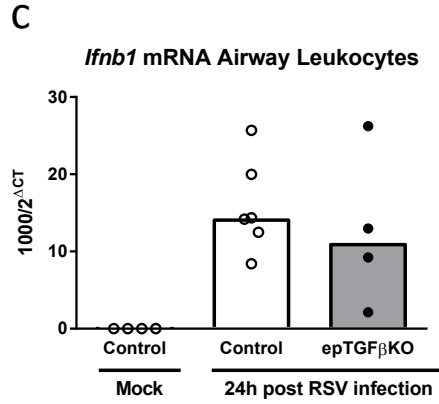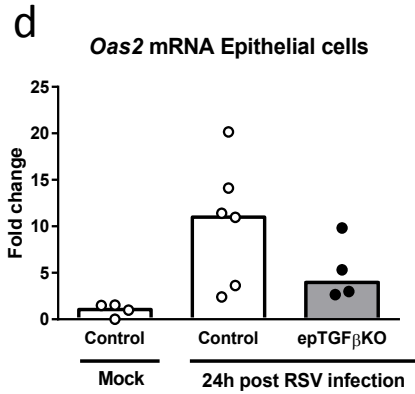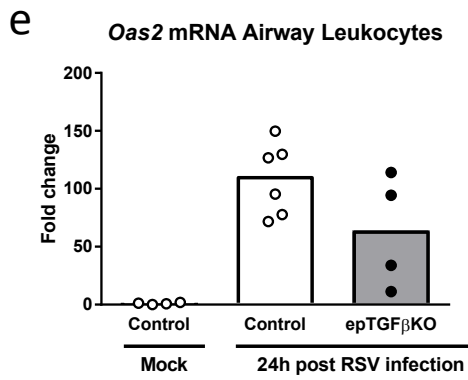

Supplement: NIHMS73566-supplement-Supplementary_Information.pdf [file NIHMS73566-supplement-Supplementary_Information.pdf]
